# Supplementary material
Source: PubMed Central journal article supplement (PMC3349843)
Supplement: mmc1.pdf [file mmc1.pdf]

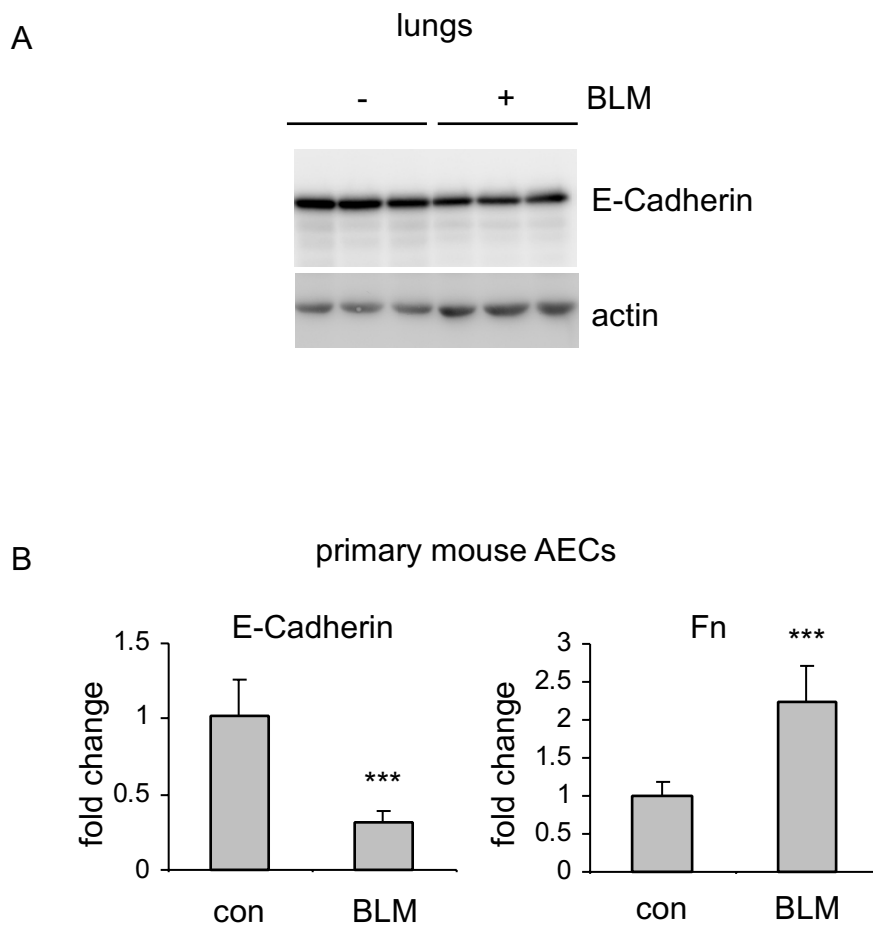

**Supplementary Figure 1.** AECs undergo EMT in lung fibrosis. Mice were injected intratracheally with saline or bleomycin (1 U/kg in 50  $\mu$ l saline) and sacrificed 14 days after the injection. (A) Lung extracts from these mice were prepared and the levels of E-Cadherin and actin in the lungs determined by Western blotting. (B) AECs from these mice were isolated and cultured as described in “Materials and Methods” and RNA from the cells isolated. The expression of E-Cadherin and fibronectin in the AECs was determined by realtime PCR assays. Five mice per group. Mean+SD. \*\*\*  $p < 0.001$  as compared to the control group.
