# Supplementary material
Source: PubMed Central journal article supplement (PMC3349843)
Supplement: mmc2.pdf [file mmc2.pdf]

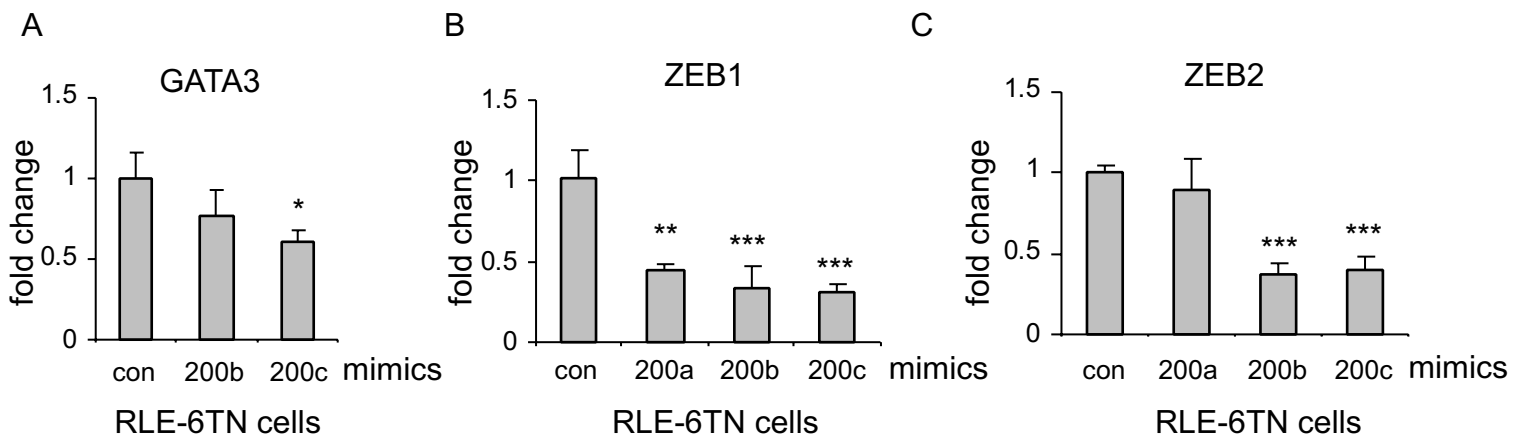

**Supplementary Figure 2.** miR-200 regulates GATA3, ZEB1 and ZEB2 in AECs. (A-C) RLE-6TN cells were transfected with 40 nM control miRNA mimics or mimics for miR-200a, miR-200b, or miR-200c. Three days after the transfection, the cells were starved in medium containing 0.5% FBS for 24 hours and then treated with 5 ng/ml TGF- $\beta$ 1 for 48 hours. The cells were collected and RNA isolated. The expression of GATA3 (A), ZEB1 (B), ZEB2 (C), and GAPDH was determined by realtime PCR. The experiments were performed in triplicate. Mean+SD. \* p<0.05, \*\* p<0.01, \*\*\* p<0.001 as compared to the control group.
